# Supplementary material
Source: Springer Nature journal article supplement (https://www.springermedizin.de/resource/supplementary/12935_2010_261_MOESM5_ESM.pdf/9540170)

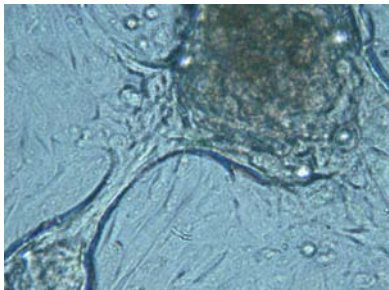

**(a)** -HC/-EGF; EtOH/DMSO (0.01%); 11d; 20x

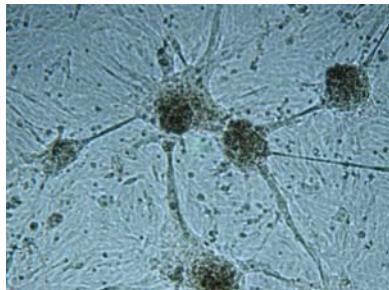

**(b)** -HC/-EGF; EtOH/DMSO (0.01%); 11d; 4x

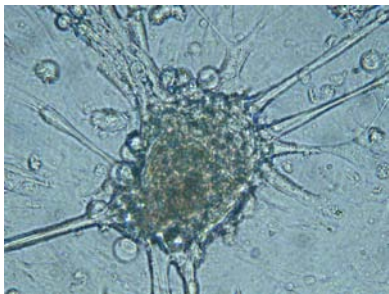

**(c)** -HC/-EGF; 0.1 nM E2; 11d; 20x

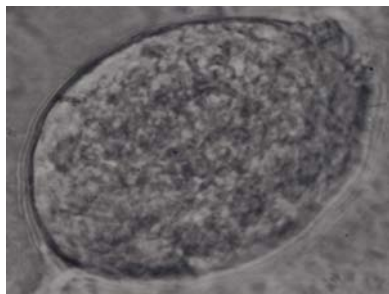

**(d)** -HC/-EGF; 10 nM E2; in poly-d-lysine (50d); 40x

Supplement: MOESM5 [file 9540170]
